# Supplementary material for: Influence of water content on elastohydrodynamic friction and film thickness of water-containing polyalkylene glycols
Source: Frontiers journal article supplement (doi:10.3389/fmech.2023.1128447), 2023-03-27
Supplement: Table_1.DOCX [file Table_1.DOCX]

Supplementary Material

Influence of water content on elastohydrodynamic friction and film thickness of water-containing polyalkylene glycols

Stefan Hofmann*, Thomas Lohner, Karsten Stahl

*** Correspondence:** Stefan Hofmann: stefan.hs.hofmann@tum.de

# Supplementary Figures and Tables

## Supplementary Figures

**Supplementary Figure 1.** : Friction maps in comparison of the investigated lubricants at pH = 1000 N/mm² and  = 40 °C

**Supplementary Figure 2.** : Friction maps in comparison of the investigated lubricants at pH = 800 N/mm² and  = 40 °C
